# Supplementary figures and images for: Automated ELISA On-Chip for the Detection of Anti-SARS-CoV-2 Antibodies
Source: MDPI journal article supplement (doi:10.3390/s21206785), 2021-10-13

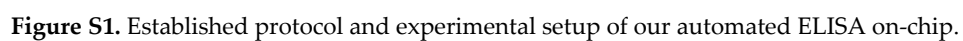

**Figure S1.** Established protocol and experimental setup of our automated ELISA on-chip.

Supplement: s1 [file s1]
